# Supplementary material for: A novel synthetic nucleic acid mixture for quantification of microbes by mNGS
Source: PubMed Central journal article supplement (PMC10926700; doi:10.1099/mgen.0.001199), 2024-02-15
Supplement: mgen-10-1199-s001.pdf [file mgen-10-1199-s001.pdf]

# A novel synthetic nucleic acid mixture for quantification of microbes by mNGS

## SUPPLEMENTARY DATA

### The performance of KCQ in fungal NA

Fungi are common pathogens that need to be analyzed in clinical practice, and their large genomes result in the possibility of some differences in sequencing detection. The ATCC mock fungal DNA mixture MSA-1010, consisting of genomic material from 10 different clinically significant mycobacteria, was therefore used to test the quantitative ability of KCQ. As shown in Supplementary Fig 1A, with the increase of MSA-1010 input, the variations among the triplicate tests of every fungus reduced significantly, and their copy numbers determined by IS (2 $\mu$ L in each reaction) tended to be consistent. Four fungal targets in the material were selected for quantitation by ddPCR as the MSA-1010 product did not come with copy numbers from the manufacture. Quantitative analysis by KCQ and ddPCR was performed using one  $\mu$ L each of MSA-1010, respectively, and it showed that both quantitative methods reached similar copy numbers of each mycobacterium (Supplementary Fig 1B), except for *Candida albicans*, the reasons for which remain to be elucidated.

A

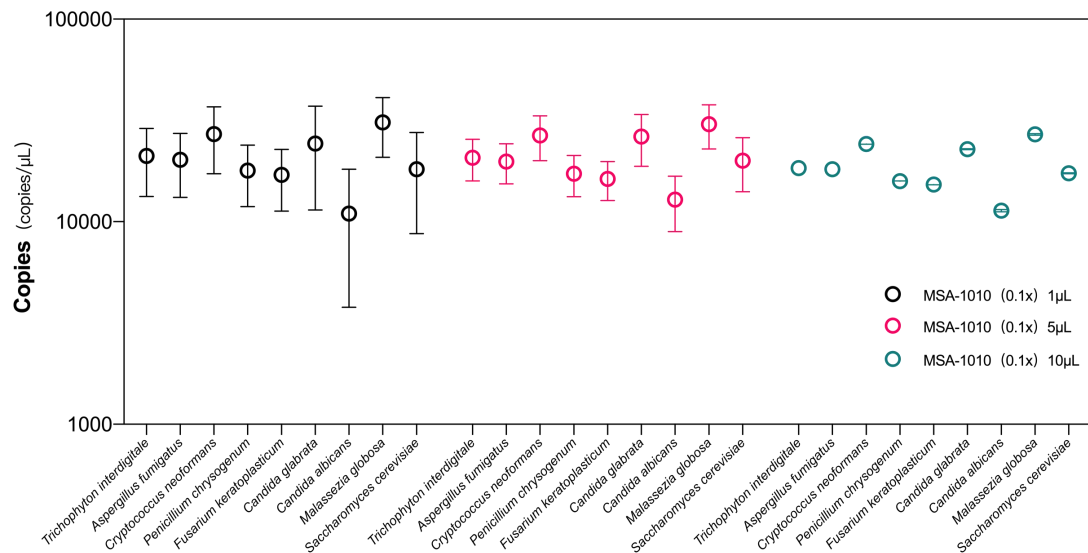

B

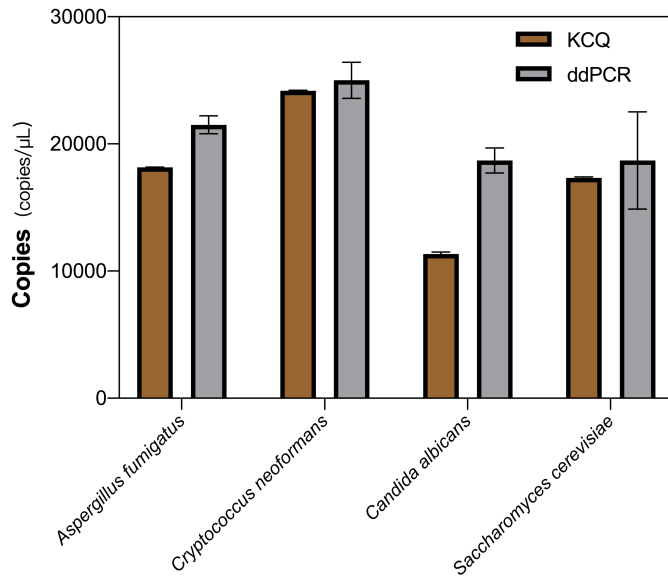

**Supplementary Fig 1. Quantitative ability of KCQ for fungi.**

(A) The effects of different MSA-4000 input volume on KCQ. With the increase of MSA-1010 input, KCQ quantification results gradually stabilized.

(B) Validation of KCQ results using ddPCR. Four clinically common fungi were selected for ddPCR validation.

**Verification of ddPCR accuracy used in this study**

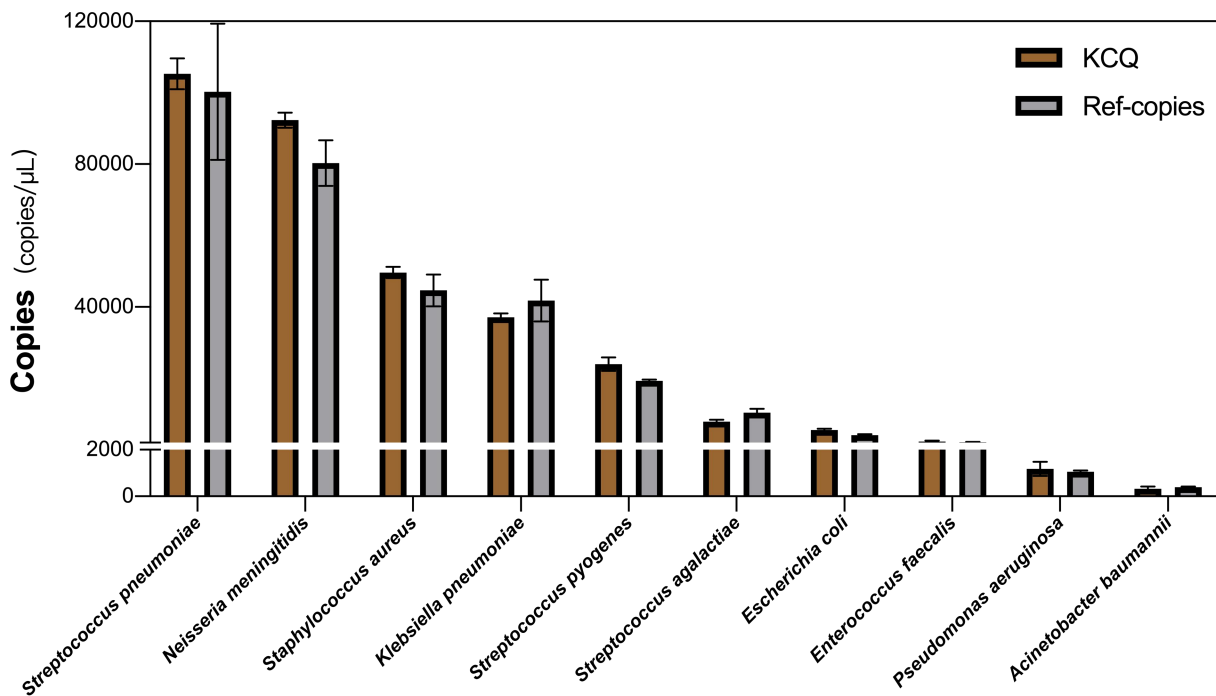

**Supplementary Fig 2. Digital droplet PCR instrument Accuracy Verification.**

Validation of ten microbial nucleic acid copy numbers in MSA-4000 using our own ddPCR assay

### Effect of human background on high copy numbers microbes.

The microbial reads with high copy numbers mentioned in main text were analyzed, and it was found that microbe generally accounted for a small data amount 1.5%~2% under the background of high host ratio. Therefore, the detected microbial reads with high copy numbers or low copy numbers had little fluctuation. However, under low host ratio, the detected microbial reads with high copy numbers accounted for a large data amount 18%~25%, leading to a large fluctuation (Fig. 3C). It was attributed to the fact that fluctuations in microbial reads were narrowed in the high host background (Fig. 3C), while such fluctuations surfaced in the low host background. This could be the major reason for KCQ quantification appears more accurate in sample that has higher human NA background.

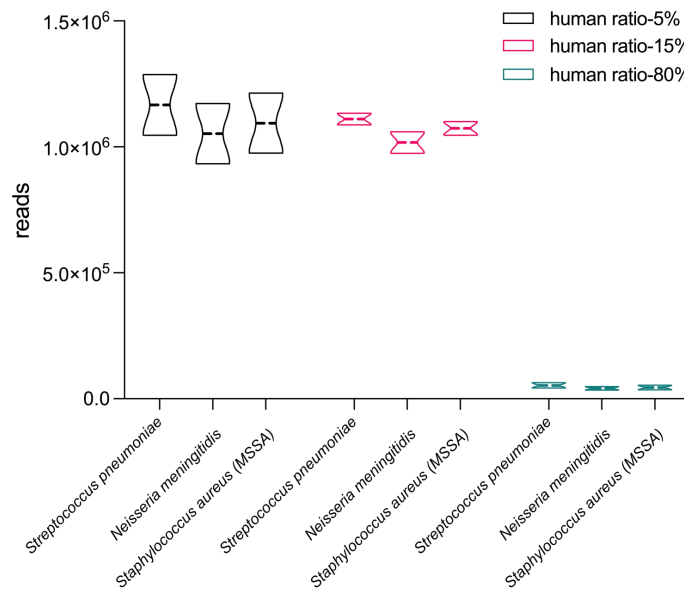

### Supplementary Fig 3. Reads of high copy number microbes under different human DNA

Fluctuation of high copy microbe reads under different human ratio. High-copy pathogens fluctuate more in detection when the ratio of human sources is low.

### Add IS in the extraction stage

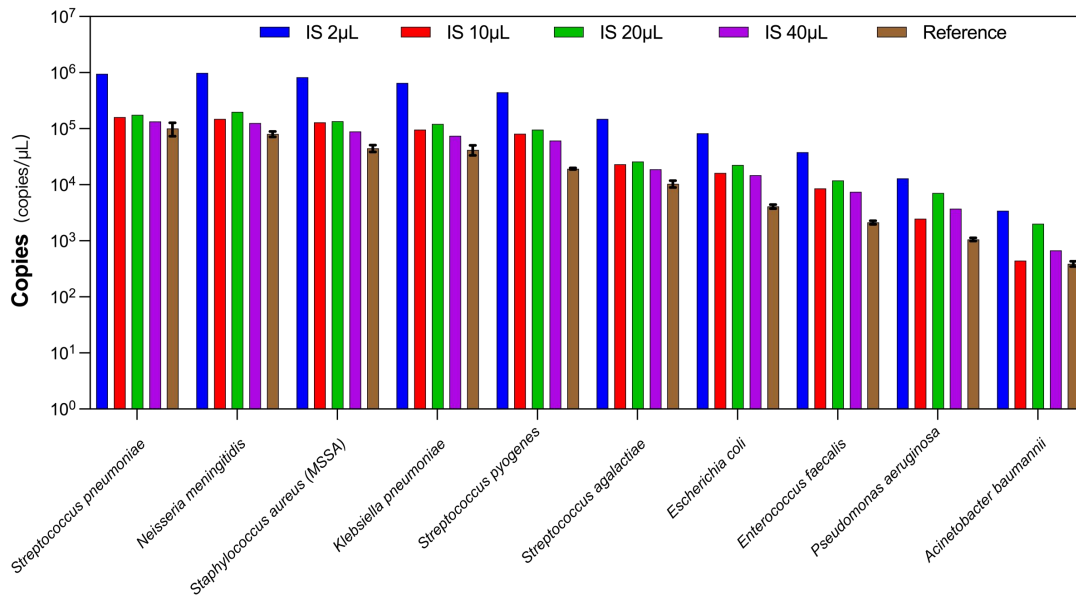

**Supplementary Fig 4. Effect of adding different volumes of IS in the NA extraction stage**

NA extraction was performed from Balf sample spiked with MSA-4000 and IS. Y-axis: copy numbers. X-axis: The 10 microorganisms included in the MSA-4000. As the volume of IS input gradually increased, the quantitative copy number of each microorganism by KCQ gradually approached the reference copy number provided by ATCC.

### Background contamination of reagents in mNGS

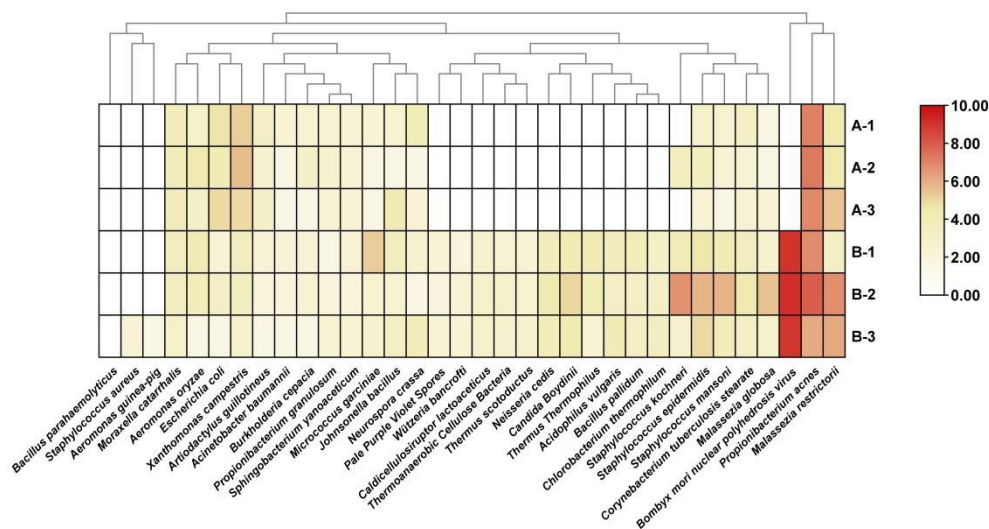

**Supplementary Fig 5. Detection of background contamination in different brands of**

### **fragmentation enzymes**

A/B: Different brands of fragmentase, Fragmentase-A and Fragmentase-B; 1/2/3: Experimental Repeat; Scale: Log(RPM); Most of the background microorganisms were significantly reduced or disappeared when the fragmentase was changed from Fragmentase-B to Fragmentase-A, e.g., *Bombyx mori nuclear polyhedrosis virus*, and there were also some background microorganisms that could not be eliminated, e.g., *Propionibacterium acnes* and *Escherichia coli*, etc.

**Table S1. Primers for microorganisms by ddPCR**

| ddPCR Primers                         | Sequence (5'- 3')         |
|---------------------------------------|---------------------------|
| <i>Acinetobacter baumannii-F</i>      | TTCAGCAAGGTCAATCGCTC      |
| <i>Acinetobacter baumannii-R</i>      | AAAGGCCAACGTATAGGCAG      |
| <i>Aspergillus fumigatus-F</i>        | TTGCTCAAACGATGCTTACA      |
| <i>Aspergillus fumigatus-R</i>        | CTATCAAGCGCGAGTTCTAC      |
| <i>Candida albicans-F</i>             | TAGCTGAGGCAAGACCAGAT      |
| <i>Candida albicans-R</i>             | AGAACATGCTACTGAAGCGG      |
| <i>Candida parapsilosis-F</i>         | CAATTGCCATAGCGTGTGTC      |
| <i>Candida parapsilosis-R</i>         | GCAGGTAACCATCCACTAGC      |
| <i>Cryptococcus neoformans-F</i>      | TTGCGTAGAAAGATCCGGC       |
| <i>Cryptococcus neoformans-R</i>      | AGATAAGTCCTAAGACCGCC      |
| <i>Enterococcus faecalis-F</i>        | CCGAGTGCTTGCACTCAATTGG    |
| <i>Enterococcus faecalis-R</i>        | CTCTTATGCCATGCGGCATAAAC   |
| <i>Epstein-Barr virus-F</i>           | CCCAACACTCCACCACACC       |
| <i>Epstein-Barr virus-R</i>           | TCTTAGGAGCTGTCCGAGGG      |
| <i>Escherichia coli-F</i>             | GGCCTTGCGATGTCTTCAAC      |
| <i>Escherichia coli-R</i>             | GTCGAAATGTTCGTCTGCCG      |
| <i>Klebsiella pneumoniae-F</i>        | GGCTAAAGCGGTGGGTATTA      |
| <i>Klebsiella pneumoniae-R</i>        | TGATATCGGTAAACGCCGTC      |
| <i>Mycoplasma pneumoniae-F</i>        | CGTGGTGAAGTGAAACATCTCAG   |
| <i>Mycoplasma pneumoniae-R</i>        | AAGCCCTACAACCCCTATCTAATG  |
| <i>Neisseria meningitidis-F</i>       | AGCAAAACATCTGGCTGGAA      |
| <i>Neisseria meningitidis-R</i>       | TAAATCGGGTACGGCTGTTG      |
| <i>Pseudomonas aeruginosa-F</i>       | CTGGGTGCGAAAGGTGGTTGTTATC |
| <i>Pseudomonas aeruginosa-R</i>       | GCGGCTGGTGCGGCTGAGTC      |
| <i>Saccharomyces cerevisiae-F</i>     | CTGTGACGACCATCAAGGTT      |
| <i>Saccharomyces cerevisiae-R</i>     | ACGGCACTTAGTAGGTAGGT      |
| <i>Staphylococcus aureus-F</i>        | TTGGTAAGGGTGTCTACAGGG     |
| <i>Staphylococcus aureus-R</i>        | CTTGGATACTTTTTTCGGCGTC    |
| <i>Stenotrophomonas maltophilia-F</i> | CTGATGCTCAACAAGCCACG      |
| <i>Stenotrophomonas maltophilia-R</i> | CTTCTGCGGACCCGTTTC        |
| <i>Streptococcus agalactiae-F</i>     | GGTGGAGATTAATCGGCGTT      |
| <i>Streptococcus agalactiae-R</i>     | CTTTGACTTCAAGCATGCGG      |
| <i>Streptococcus pneumoniae-F</i>     | ATGCGACTTCTAATTACTCAG     |
| <i>Streptococcus pneumoniae-R</i>     | CATTATCAGTCCCAGTCGGT      |
| <i>Streptococcus pyogenes-F</i>       | TGCTACTGCAACTGCTCAA       |
| <i>Streptococcus pyogenes-R</i>       | AGCTACCTGCAGAACCCTA       |
| <i>Yarrowia lipolytica-F</i>          | TCACTTCGCATTCTCTGGAC      |
| <i>Yarrowia lipolytica-R</i>          | GCTCCATCAATCAGTCGGTT      |

**Table S2. Primers for amplification of IS sequences**

| IS Primers | Sequence (5'- 3')     |
|------------|-----------------------|
| IS1-1F     | GGCGATGTCCCTACCT      |
| IS1-1R     | GAGCCTTTGCTGATGC      |
| IS1-2F     | ATCCGCCGATGATAGAG     |
| IS1-2R     | AAGGGCCATTTGAAGG      |
| IS1-3F     | TCAAACGCCAAGGTCA      |
| IS1-3R     | GCGAGTAGCCGTTAGGT     |
| IS2-1F     | ATACGCCACCACCAAGAT    |
| IS2-1R     | AAGACGACTGAACCGAAA    |
| IS2-2F     | TCATGCCTACTTTGTTGC    |
| IS2-2R     | TATGTGCCGTTATGTGCT    |
| IS2-3F     | CGACGCAAGAACACCG      |
| IS2-3R     | TCCACTATGACGCACTCC    |
| IS3-1F     | ATGTGCCCAGTCCAACG     |
| IS3-1R     | CGAGGAAATCCGAGGTG     |
| IS3-2F     | TGTATCTGGTAACCCTCG    |
| IS3-2R     | TAGTTTCGTCCTTATCTTTG  |
| IS3-3F     | GCATTTGCGGTTCTGA      |
| IS3-3R     | CTGGAGCAGTCCCTTG      |
| IS4-1F     | GCAGGCAAGAAATAGTATCAG |
| IS4-1R     | GGCGAGAAAGCCCAAT      |
| IS4-2F     | TCACTCCTGGCTCTTACTC   |
| IS4-2R     | TGTGGGCTTATCACTTCTA   |
| IS4-3F     | CACGGGTCTATTATTCAACT  |
| IS4-3R     | CCTGCTCACGCTCTATC     |
| IS5-1F     | TCGCTGTCTCCTGAAATG    |
| IS5-1R     | TGCTACCCTCGCAACC      |
| IS5-2F     | AGCGTGCTTATGAACTTTG   |
| IS5-2R     | CAACCAGGACGGACATT     |
| IS5-3F     | GCTCAGACCTCCTATTGT    |
| IS5-3R     | CTCACTTGCGTACCTCA     |
